# Supplementary material
Source: PubMed Central journal article supplement (PMC7704751)
Supplement: mmc1.pdf [file mmc1.pdf]

**YMTHE, Volume 28**

**Supplemental Information**

**Targeted Delivery of CXCL9 and OX40L**

**by Mesenchymal Stem Cells**

**Elicits Potent Antitumor Immunity**

**Pan Yin, Liming Gui, Caihong Wang, Jingjing Yan, Min Liu, Lu Ji, You Wang, Bin Ma, and Wei-Qiang Gao**

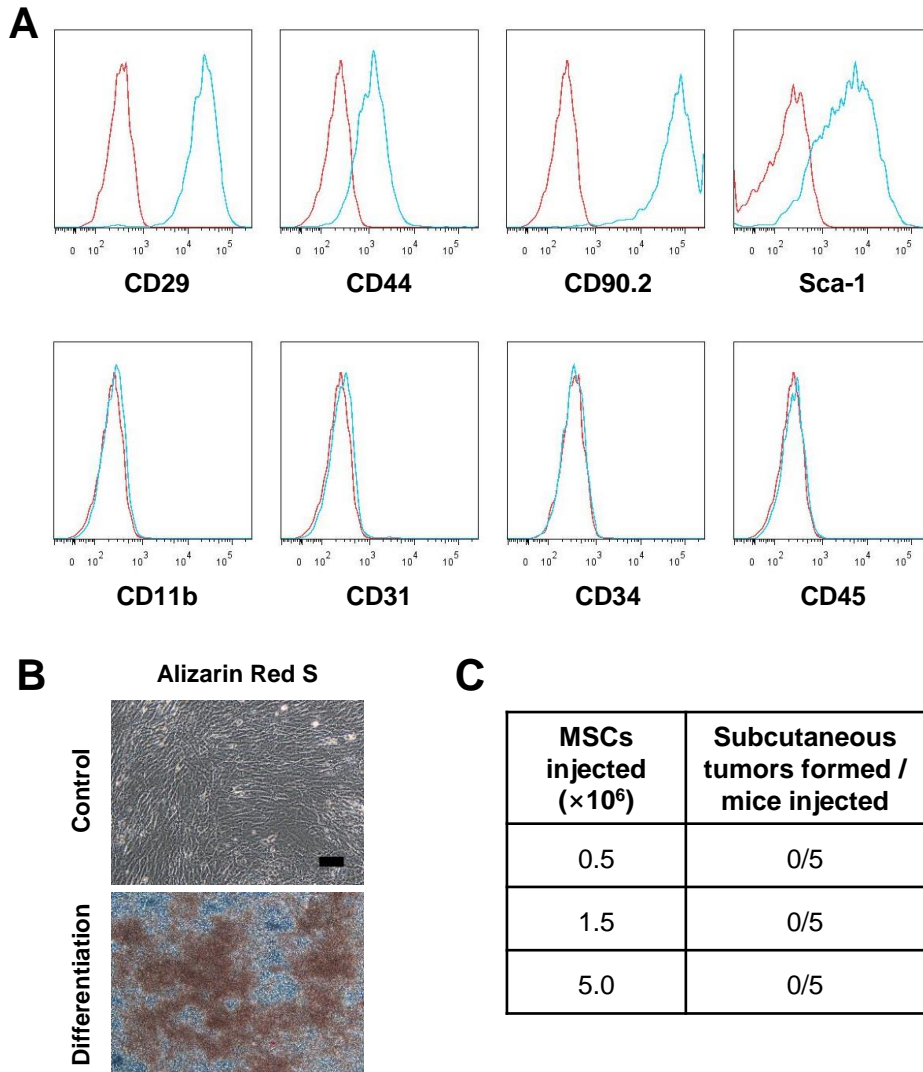

**Figure S1.** AT-MSCs exhibit osteogenic differentiation ability but no tumorigenic potential.

(A) Characterization of AT-MSCs isolated from C57BL/6 mice by FACS. (B) The ability of mouse AT-MSCs to differentiate into osteocytes was determined by Alizarin Red S staining. Scale bar = 200  $\mu$ m. (C) Different numbers of AT-MSCs isolated from BALB/c mice were injected subcutaneously to BALB/c mice and tumor formation was evaluated for 60 days.

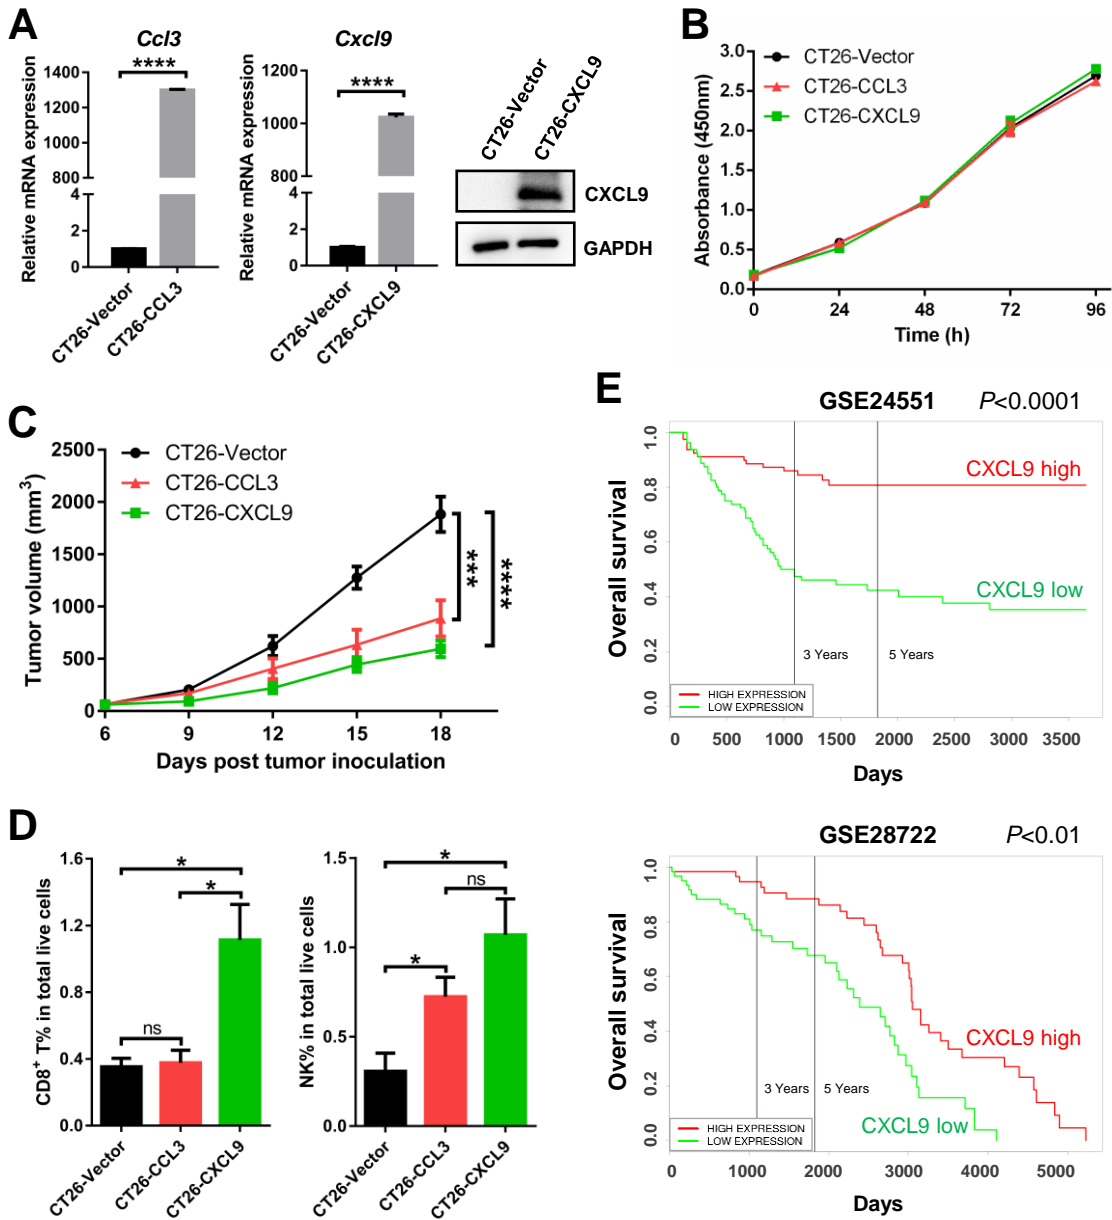

**Figure S2.** Tumoral expression of CXCL9 results in tumor regression.

(A) Detection of CCL3 and CXCL9 mRNA expression in CT26 by qPCR, and CXCL9 protein levels by Western blotting (n = 3). (B) Proliferation of CT26-Vector, CT26-CCL3 and CT26-CXCL9 cells was measured using CCK-8 assay (n = 3). (C) CT26-Vector, CT26-CCL3 or CT26-CXCL9 cells were injected subcutaneously into BALB/c mice, and the size of the tumor was monitored (n = 5 mice per group). (D) Percentages of the CD8<sup>+</sup> T and NK cells within total live cells were shown (n = 3). (E) Correlation of CXCL9 mRNA expression and survival rate in colorectal cancer patients (Datasets: GSE24551 and GSE28722). \*  $P < 0.05$ , \*\*\*  $P < 0.001$ , \*\*\*\*  $P < 0.0001$ , ns = not significant.

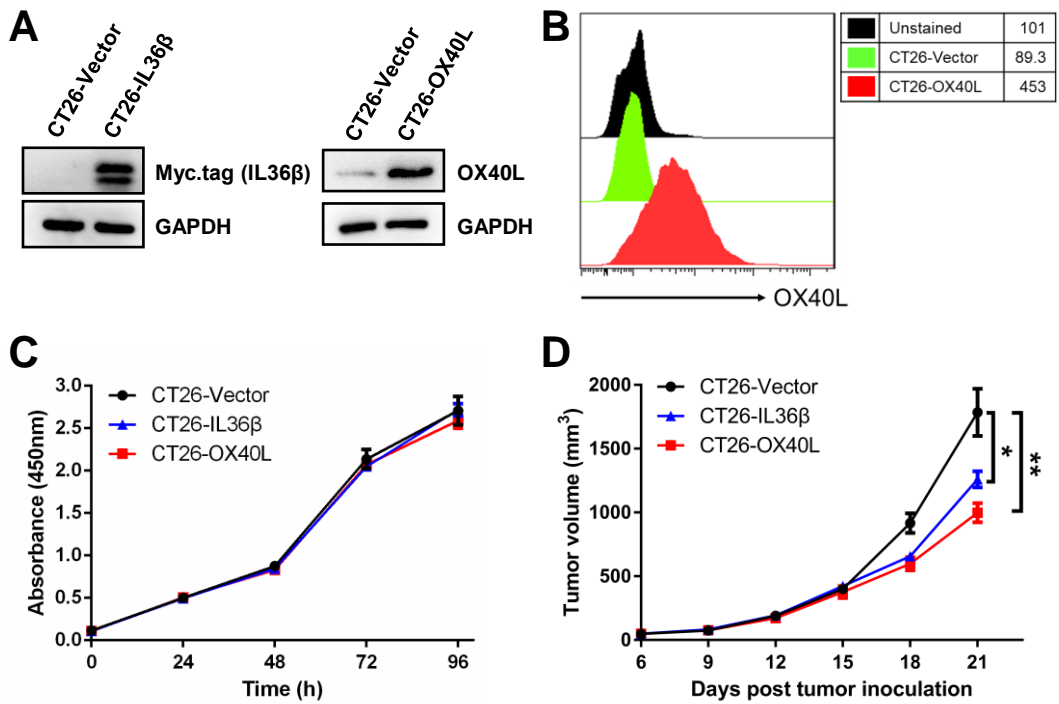

**Figure S3.** Tumoral expression of OX40L inhibits tumor growth.

(A) Expression of IL36 $\beta$  and OX40L proteins in CT26 was detected by Western blotting. (B) Expression of membrane-bound OX40L in CT26 was detected by FACS. (C) Proliferation of CT26-Vector, CT26-CCL3 and CT26-CXCL9 cells was evaluated using CCK-8 assay (n = 3). (D) CT26-vector or CT26-IL36 $\beta$  or CT26-OX40L cells were injected subcutaneously into BALB/c mice. The size of the tumor was recorded (n = 4 mice per group). \*  $P < 0.05$ , \*\*  $P < 0.01$ .

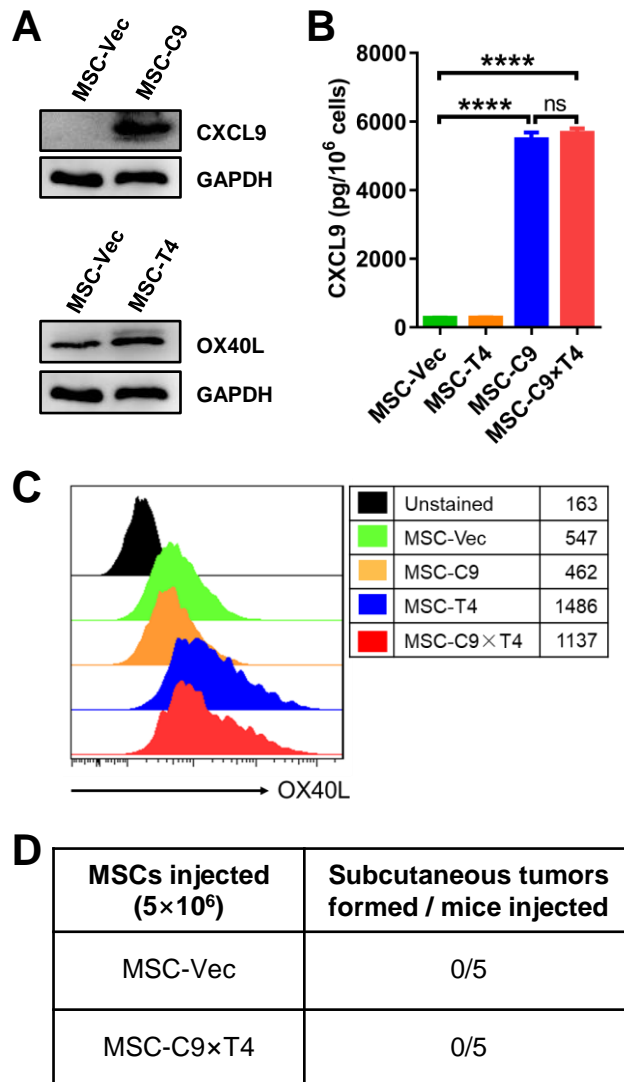

**Figure S4.** CXCL9 and OX40L are successfully overexpressed in AT-MSCs.

(A) Expression of CXCL9 and OX40L in AT-MSCs was detected by Western blotting. (B) Secretion of CXCL9 by transduced AT-MSCs was determined by ELISA (n = 4). (C) Expression OX40L on cell membranes was detected by flow cytometry. (D) AT-MSCs isolated from BALB/c mice were lentivirally transduced and injected subcutaneously to BALB/c mice and tumor formation was evaluated for 120 days. \*\*\*\*  $P < 0.0001$ , ns = not significant.

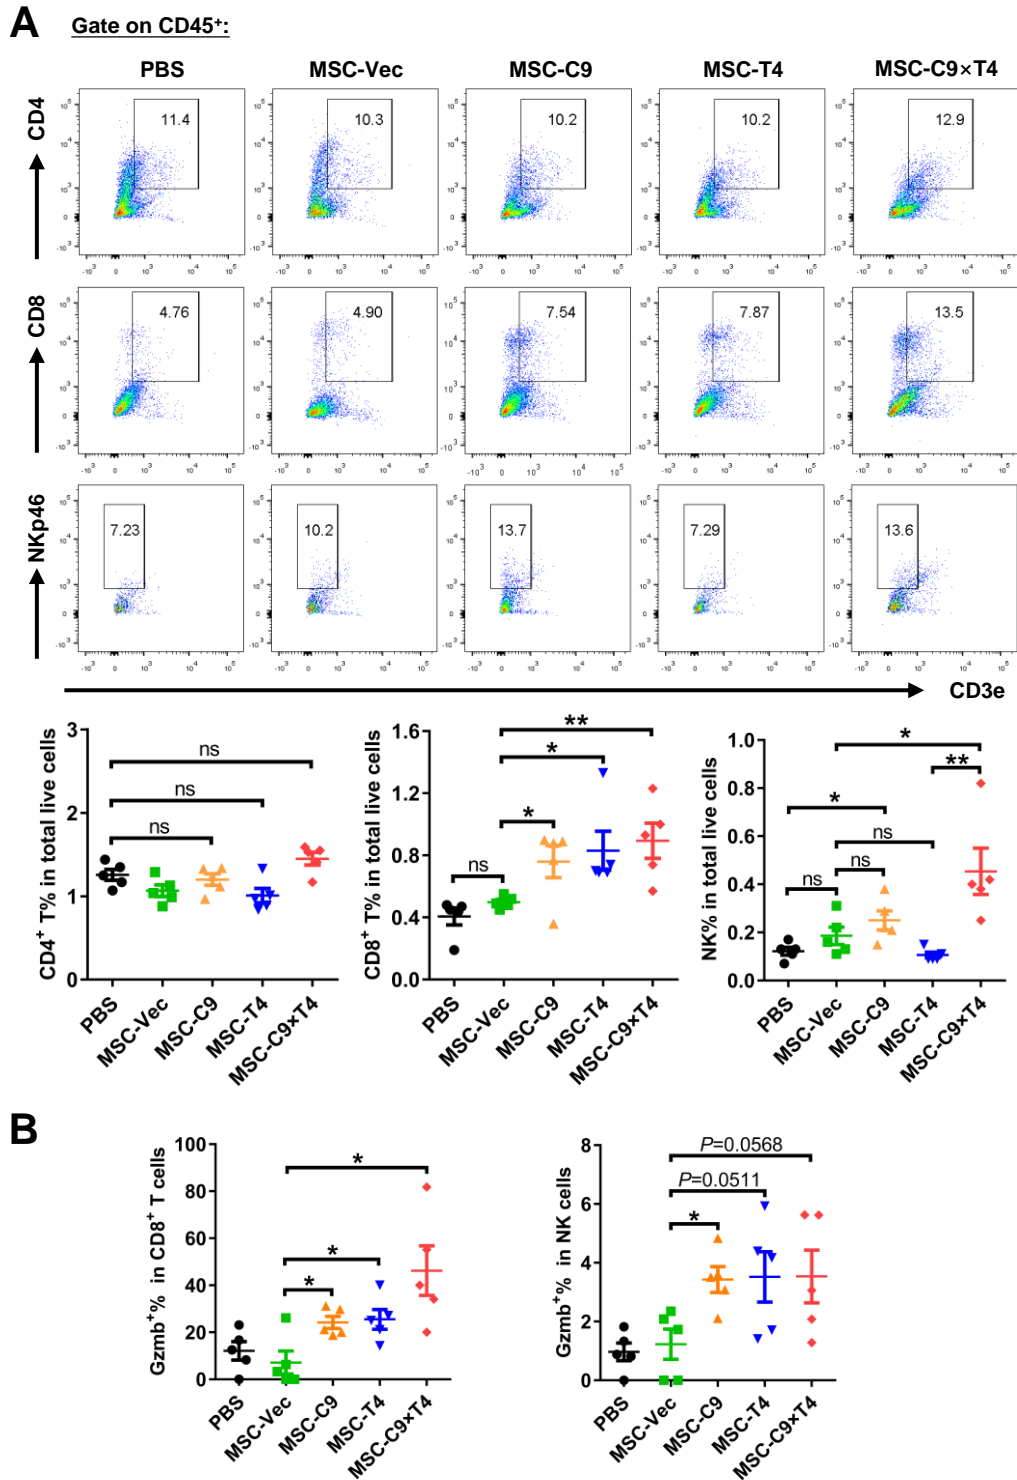

**Figure S5.** Delivery of CXCL9 and OX40L by AT-MSCs shapes MC38 tumor immune microenvironment.

(A) Tumor-infiltrating CD4<sup>+</sup> T, CD8<sup>+</sup> T, and NK cells were analyzed by FACS three days after the last injection of MSCs in MC38 tumor model (n = 5). (B) Expression of granzyme B (Gzmb) in CD8<sup>+</sup> T and NK cells was analyzed by flow cytometry (n = 5). \*  $P < 0.05$ , \*\*  $P < 0.01$ , ns = not significant.

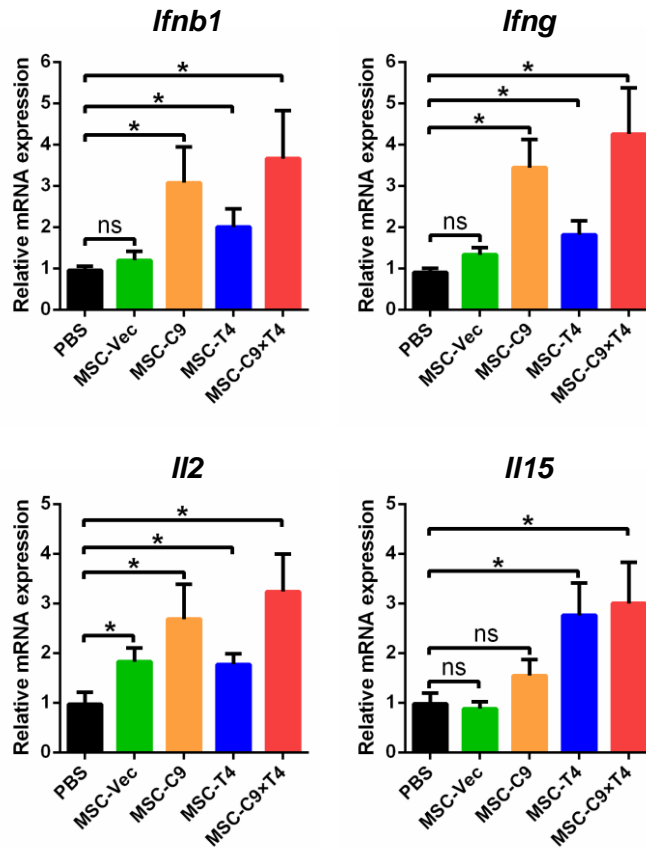

**Figure S6.** qPCR analysis of cytokine expression in MC38 tumors treated with engineered AT-MSCs.

Cytokine mRNA expression of MC38 tumors treated with MSC-Vec, MSC-C9, MSC-T4, MSC-C9xT4 or PBS was quantified using qPCR (n = 5). \*  $P < 0.05$ , ns = not significant.

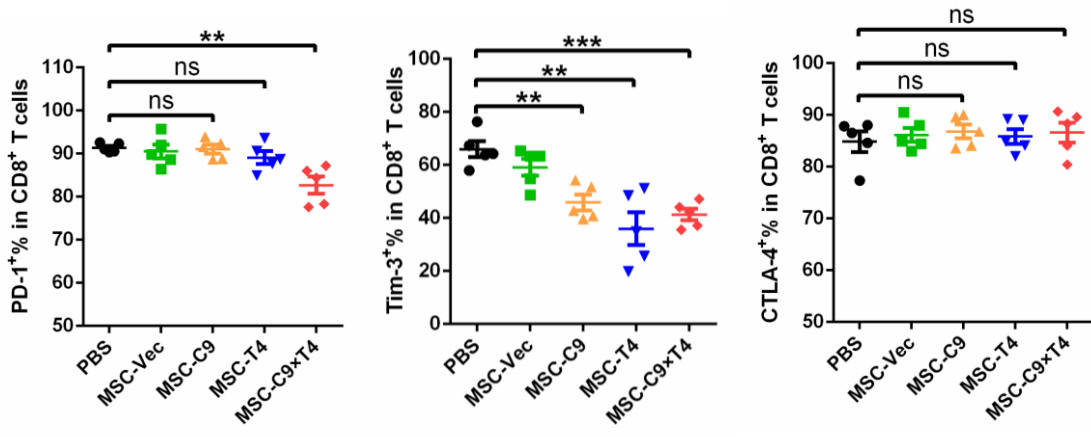

**Figure S7.** Expression of immune inhibitory molecules on tumor CD8<sup>+</sup> T cells upon MSC therapy.

Expression of PD-1, Tim-3 and CTLA-4 on CD8<sup>+</sup> T cells in MC38 tumors was analyzed by FACS (n = 5). \*\*  $P < 0.01$ , \*\*\*  $P < 0.001$ , ns = not significant.



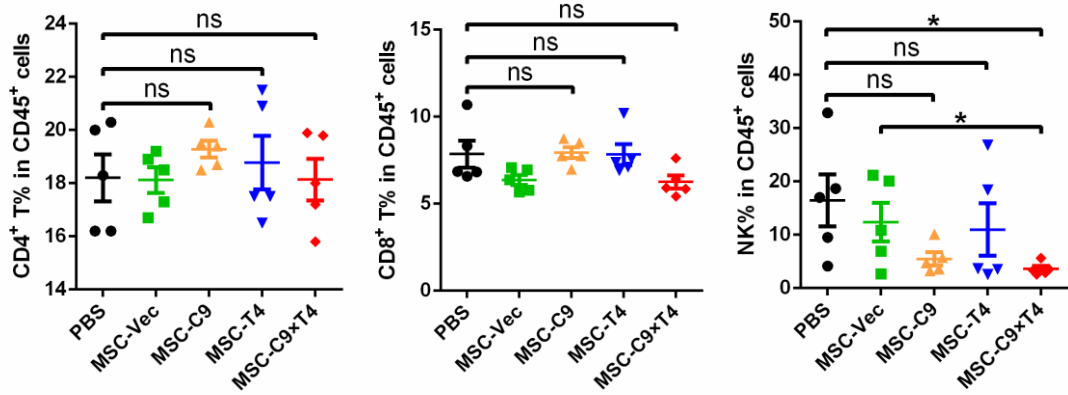

**Figure S8.** FACS analysis of splenic T and NK cells upon MSC therapy.

Splenic CD4<sup>+</sup> T, CD8<sup>+</sup> T, and NK cells were analyzed by FACS in MC38 mouse tumor models received MSC therapy (n = 5). \*  $P < 0.05$ , ns = not significant.

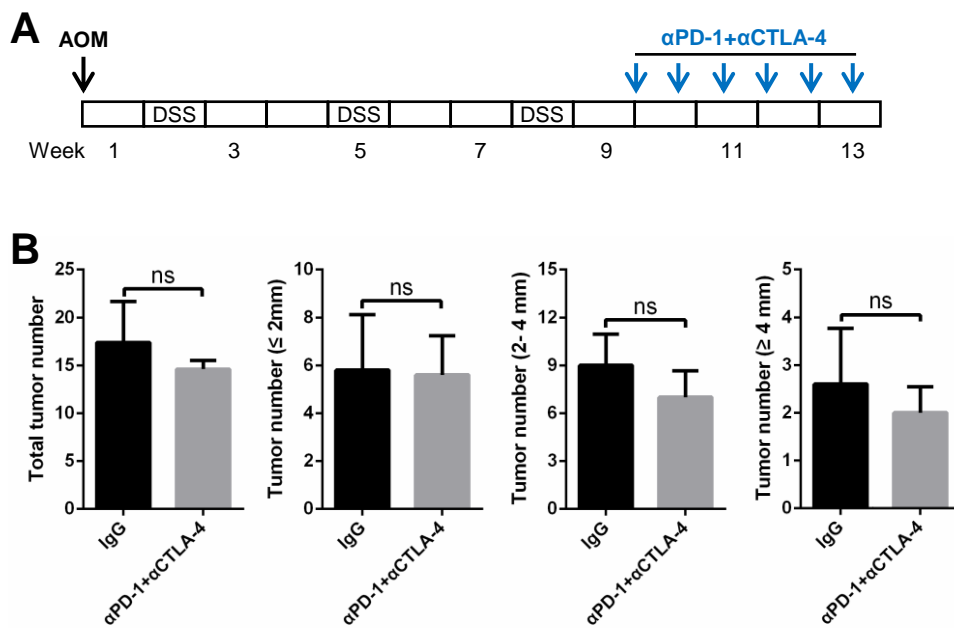

**Figure S9.** Checkpoint inhibitors do not impair colitis-associated cancer progression.

(A) Scheme of AOM/DSS administration and antibody treatment schedule. (B) Average number of tumors in different size ranges ( $n = 5$  mice per group). ns = not significant.

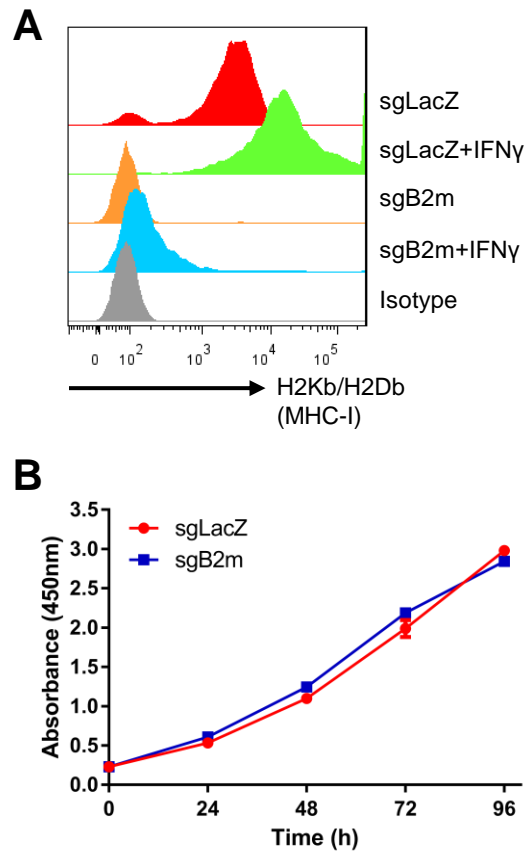

**Figure S10.** Absence of MHC-I on MC38 cells does not influence cell proliferation *in vitro*.

(A) FACS analysis of H2Kb/H2Db (MHC-I) on B2m-KO (sgB2m) and control (sgLacZ) MC38 cells *in vitro* with or without recombinant mouse IFN- $\gamma$  stimulation. (B) Proliferation of MC38-sgB2m and MC38-sgLacZ cells *in vitro* was measured using CCK-8 assay (n = 4).

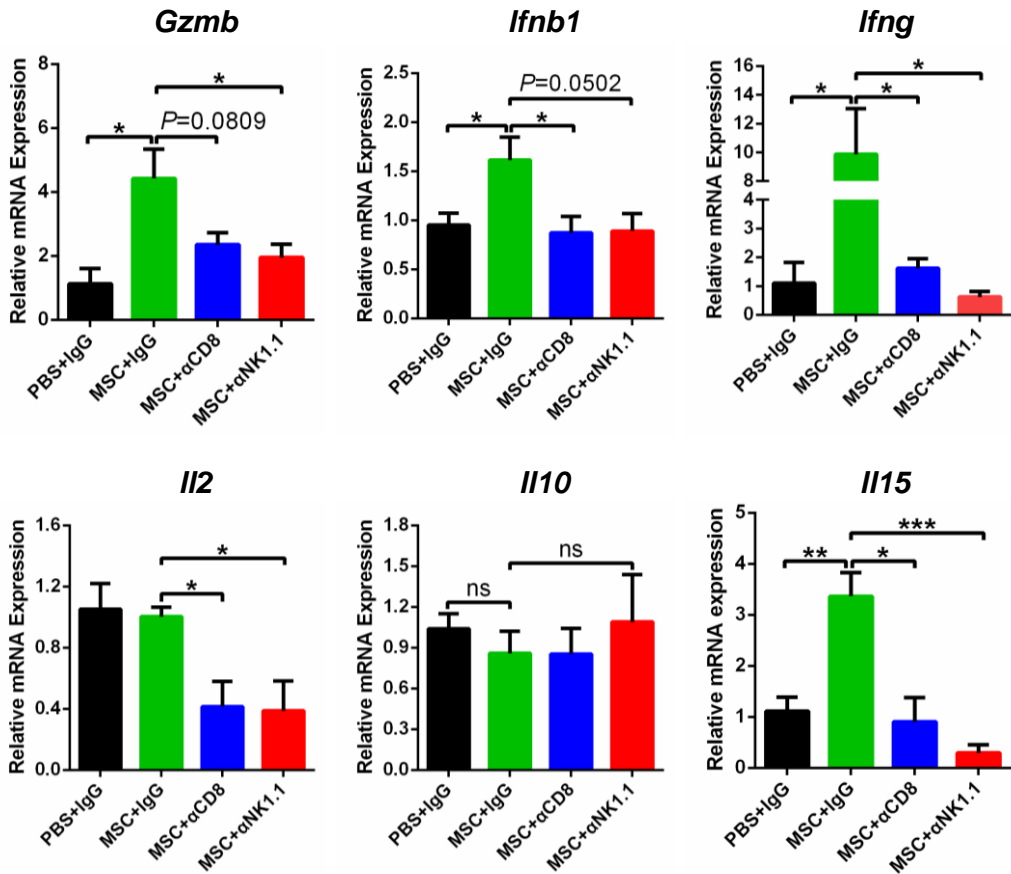

**Figure S11.** qPCR analysis of cytokine expression in MHC-I-deficient MC38 tumors treated with MSC-C9×T4.

Cytokine mRNA expression of MHC-I-deficient MC38 tumors treated with MSC-C9×T4 and αCD8/αNK1.1 depleting antibodies was quantified using qPCR (n = 4). \*  $P < 0.05$ , \*\*  $P < 0.01$ , \*\*\*  $P < 0.001$ , ns = not significant.
